# Supplementary material for: Value of Cellular Components and Focal Dedifferentiation to Predict the Risk of Metastasis in a Benign-Appearing Extra-Meningeal Solitary Fibrous Tumor: An Original Series from a Tertiary Sarcoma Center
Source: MDPI journal article supplement (doi:10.3390/cancers15051441), 2023-02-24
Supplement: s1 [file s1]

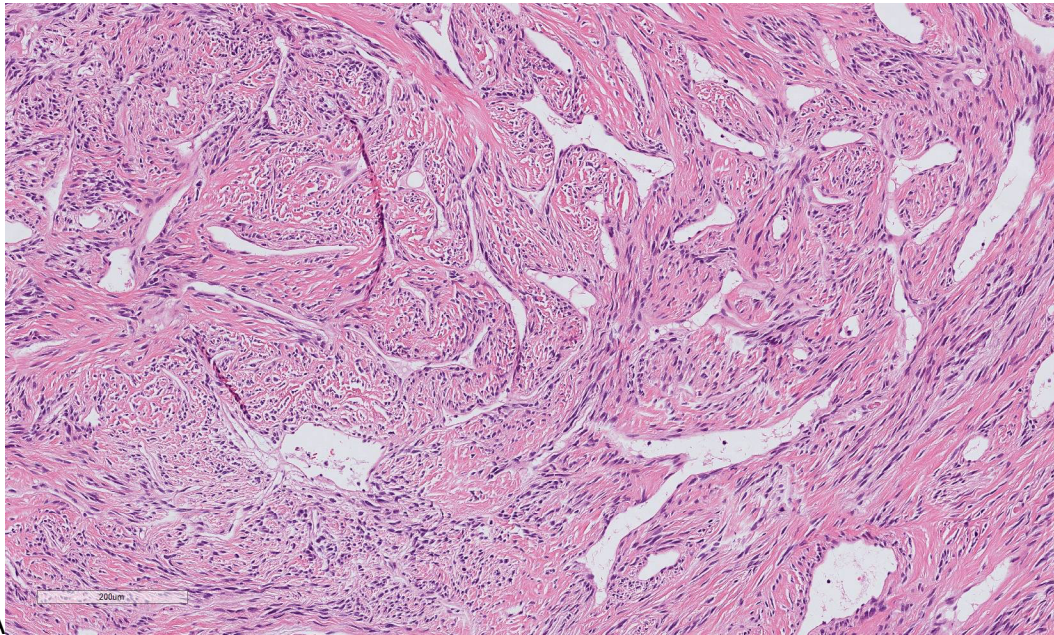

A

**Figure 2A:** Classic hyalinized solitary fibrous tumor

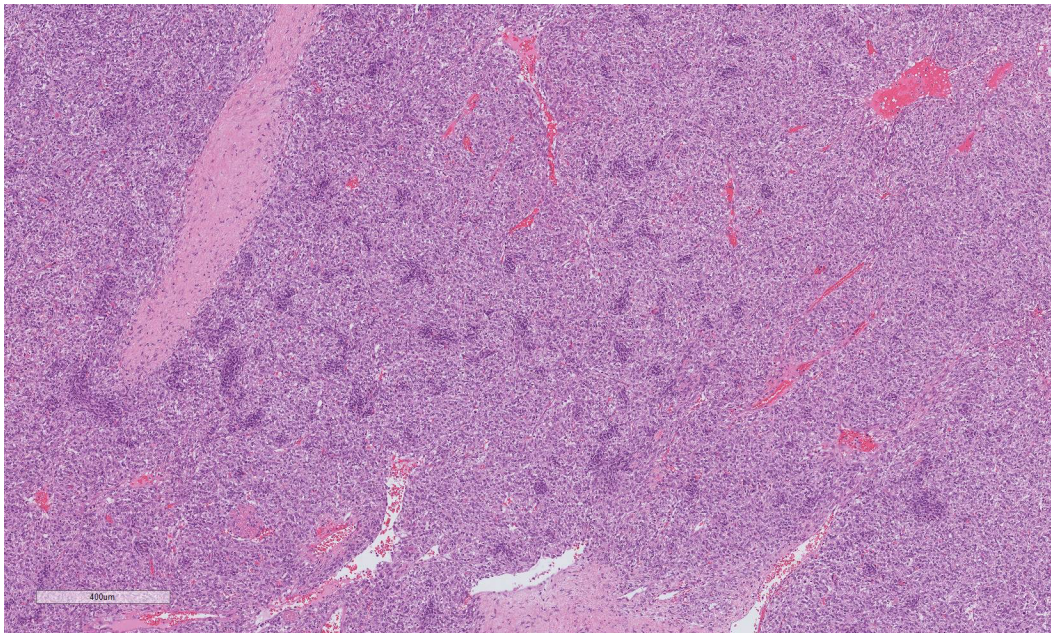

B

**Figure 2B:** Cellular variant of the tumor. The cellular SFT is characterized by a tightly packed proliferation of ovoid to spindle cells arranged around conspicuous vessels and scant stromal components.



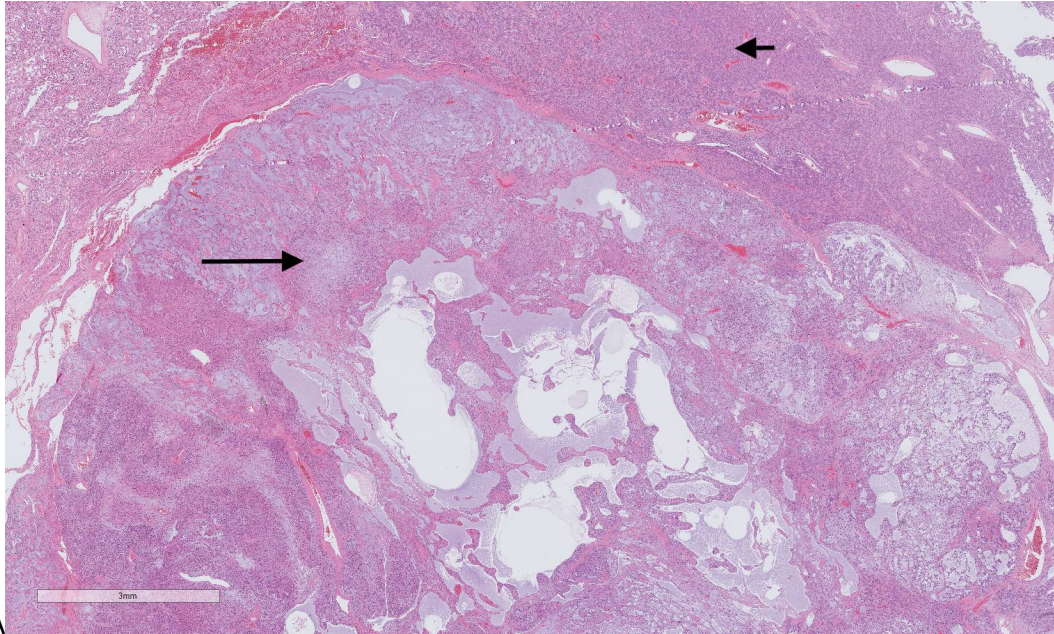

**Figure 6.** Dedifferentiated Solitary Fibrous Tumor H&E staining. Two distinct areas of typical solitary fibrous tumor (upper part/short arrow) and high-grade pleomorphic sarcoma (lower part/long arrow).
